# Supplementary material
Source: Springer Nature journal article supplement (https://www.springermedizin.de/resource/supplementary/12879_2012_2171_MOESM4_ESM.pdf/9443840)

**A) Cost-effectiveness Acceptability Curve**

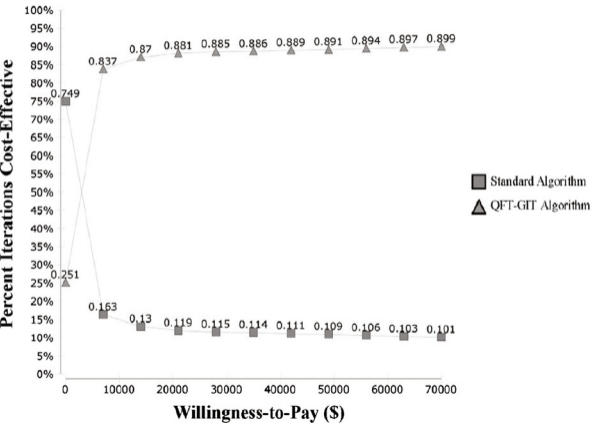

**B) Incremental costs and effects of QFT-GIT vs Standard Algorithm**

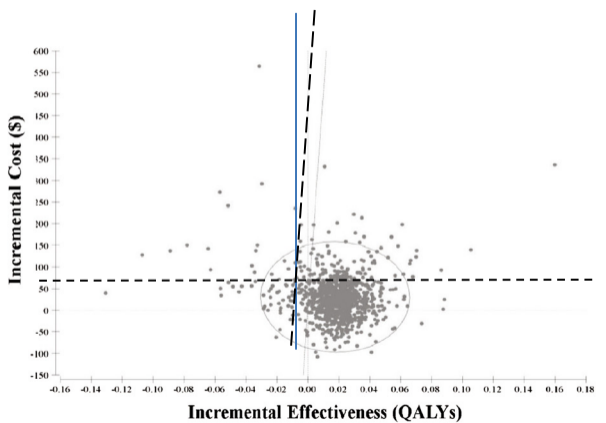

Supplement: MOESM4 [file 9443840]
